# Supplementary material for: Galactic-form spinning beams
Source: Research Square preprint supplement (doi:10.21203/rs.3.rs-7151603/v1), 2025-08-07
Supplement: Supplementary file 1 [file 2ce2c1387b8e02592f794f46.docx]

**Caption for Visualization 1:**

Generated Beams: Simulated recorded diffraction patterns of a plane wave from amplitude spiral-like structures having a sinusoidal profile, with m = 10, L = 5 in (a) and m = 10, L = 10 in (b) observed under propagation.

**Caption for Visualization 2:**

Main Intensity Spots of Generated Beams; Optical Drills: Illustration of rotation of the MISs of the generated beam-like patterns in the diffraction of a plane wave from spiral-like structures with m = 10, L = 5 in (a) and m = 10, L = 10 in (b) under propagation. The surrounding intensity distribution has been excluded to better highlight the rotation of the MISs.

**Caption for Visualization 3:**

Generated Beams: Simulated recorded diffraction patterns of a plane wave from amplitude spiral-like structures with a sinusoidal profile, for m = 2, L = 1 in (a), m = 4, L = 1 in (b), m = 2, L = 3 in (c) and m = 4, L = 3 in (d) observed under propagation.

=========================================================================
**Caption for Visualization 4:**

Generated Beam: Simulated recorded diffraction patterns of a plane wave from amplitude spiral-like structure having a sinusoidal profile, with m = 10, L = 10 in (a) and corresponding phase distribution in (b) observed under propagation.

**Caption for Visualization 5:**

Simulated diffraction pattern of a plane wave transmitted through an amplitude spiral zone plate (SZP) with topological charge = 3, observed during propagation.

**Caption for Visualization 6:**

Generated Beams: (a) Simulated and (b) experimentally recorded diffraction patterns of a plane wave from an amplitude spiral-like structure having a sinusoidal profile, with m = 10 and L = 5, observed under propagation.

**Caption for Visualization 7**

Generated Beams: (a) Simulated and (b) experimentally recorded diffraction patterns of a plane wave from an amplitude spiral-like structure having a sinusoidal profile, with m = 10 and L = 10, observed under propagation.

**Caption for Visualization 8**

Generated Beams: (a) Simulated and (b) experimentally recorded diffraction patterns of a plane wave from an amplitude spiral-like structure having a sinusoidal profile, with m = 30 and L = 10, observed under propagation.

=========================================================================

**Caption for Visualization 9:**

Generated Beams: (a) Simulated and (b) experimentally recorded diffraction patterns of a plane wave from an amplitude spiral-like structure having a binary profile, with m = 20 and L = 5, observed under propagation.

**Caption for Visualization 10:**

Generated Beams: Simulated recorded diffraction patterns of a plane wave from amplitude spiral-like structures having a sinusoidal profile, with m = 10, L = 10, for two different wavelengths: = 400 nm, = 800 nm.

**Caption for Visualization 11:**

Simulated Diffraction Patterns of Generated Beams (Green Intensity View): The color patterns depict the diffraction of a plane wave from three spiral-like structures with a sinusoidal amplitude profile, with the following parameters: (a) m = 10, L = 1, (b) m = 10, L = 3, and (c) m = 10, L = 5. The central gray regions show the spiral structures responsible for the surrounding colored diffraction patterns. The intensity distribution of the surrounding area is shown in green for clarity.
